# Supplementary material for: Genotype and Cardiac Outcomes in Pediatric Dilated Cardiomyopathy
Source: PubMed Central journal article supplement — J Am Heart Assoc. 2021 Dec 22;11(1):e022854. doi: 10.1161/JAHA.121.022854 (PMC9075202; doi:10.1161/jaha.121.022854), 2021-12-22
Supplement: JAH3-11-e022854-s001.pdf [file JAH3-11-e022854-s001.pdf]

# **SUPPLEMENTAL MATERIAL**



| Gene   | Harvard Partners LMM 2007 | Harvard Partners LMM 2009 | GeneDx 2009 | Transgenomic/Familion 2009 | Harvard Partners LMM 2011 | GeneDx DCM 2011 | Transgenomic/Familion 2011 | Harvard Partners LMM 2013 | GeneDx 2013 | Transgenomic/Familion 2013 | GeneDx 2017* | Invitae 2017* |
|--------|---------------------------|---------------------------|-------------|----------------------------|---------------------------|-----------------|----------------------------|---------------------------|-------------|----------------------------|--------------|---------------|
| DSC2   |                           |                           |             |                            | ✓                         |                 |                            | ✓                         |             |                            | ✓            | ✓             |
| DSG2   |                           |                           |             |                            | ✓                         |                 |                            | ✓                         |             |                            | ✓            | ✓             |
| DSP    |                           |                           |             |                            | ✓                         |                 |                            | ✓                         |             |                            | ✓            | ✓             |
| DTNA   |                           |                           |             |                            | ✓                         |                 |                            | ✓                         |             |                            | ✓            | ✓             |
| EMD    |                           | ✓                         |             |                            | ✓                         |                 |                            | ✓                         | ✓           |                            | ✓            | ✓             |
| EYA4   |                           |                           |             |                            |                           |                 |                            |                           |             |                            |              | ✓             |
| FHL1   |                           |                           |             |                            |                           |                 |                            |                           |             |                            | ✓            | ✓             |
| FHL2   |                           |                           |             |                            | ✓                         |                 |                            | ✓                         |             |                            |              | ✓             |
| FKRP   |                           |                           |             |                            |                           |                 |                            |                           |             |                            | ✓            | ✓             |
| FKTN   |                           |                           |             |                            |                           |                 |                            |                           |             |                            | ✓            | ✓             |
| FLNC   |                           |                           |             |                            |                           |                 |                            |                           |             |                            |              | ✓             |
| GAA    |                           |                           |             |                            |                           |                 |                            |                           |             |                            |              | ✓             |
| GATA4  |                           |                           |             |                            |                           |                 |                            |                           |             |                            |              | ✓             |
| GATA6  |                           |                           |             |                            |                           |                 |                            |                           |             |                            |              | ✓             |
| GATAD1 |                           |                           |             |                            |                           |                 |                            | ✓                         |             |                            | ✓            | ✓             |
| GLA    |                           |                           |             | ✓                          | ✓                         |                 |                            | ✓                         |             |                            | ✓            | ✓             |
| HCN4   |                           |                           |             |                            |                           |                 |                            |                           |             |                            | ✓            | ✓             |
| HRAS   |                           |                           |             |                            |                           |                 |                            |                           |             |                            | ✓            |               |
| ILK    |                           |                           |             |                            |                           |                 |                            |                           |             |                            | ✓            | ✓             |
| JPH2   |                           |                           |             |                            |                           |                 |                            |                           |             |                            | ✓            | ✓             |
| JUP    |                           |                           |             |                            | ✓                         |                 |                            | ✓                         |             |                            | ✓            | ✓             |
| KRAS   |                           |                           |             |                            |                           |                 |                            |                           |             |                            | ✓            |               |
| LAMA4  |                           |                           |             |                            | ✓                         |                 |                            | ✓                         |             |                            | ✓            | ✓             |
| LAMP2  |                           |                           | ✓           | ✓                          | ✓                         | ✓               |                            | ✓                         | ✓           |                            | ✓            | ✓             |



| Gene    | Harvard Partners LMM 2007 | Harvard Partners LMM 2009 | GeneDx 2009 | Transgenomic/ Familion 2009 | Harvard Partners LMM 2011 | GeneDx DCM 2011 | Transgenomic/ Familion 2011 | Harvard Partners LMM 2013 | GeneDx 2013 | Transgenomic/ Familion 2013 | GeneDx 2017* | Invitae 2017* |
|---------|---------------------------|---------------------------|-------------|-----------------------------|---------------------------|-----------------|-----------------------------|---------------------------|-------------|-----------------------------|--------------|---------------|
| MYH6    |                           |                           |             |                             | ✓                         |                 |                             | ✓                         |             |                             | ✓            | ✓             |
| MYH7    | ✓                         | ✓                         | ✓           | ✓                           | ✓                         | ✓               | ✓                           | ✓                         | ✓           | ✓                           | ✓            | ✓             |
| MYL2    |                           |                           |             | ✓                           | ✓                         |                 |                             |                           |             |                             | ✓            | ✓             |
| MYL3    |                           |                           |             | ✓                           | ✓                         |                 |                             | ✓                         |             |                             | ✓            | ✓             |
| MYLK2   |                           |                           |             |                             | ✓                         |                 |                             | ✓                         |             |                             | ✓            | ✓             |
| MYOM1   |                           |                           |             |                             |                           |                 |                             |                           |             |                             |              | ✓             |
| MYOZ2   |                           |                           |             |                             | ✓                         |                 |                             | ✓                         |             |                             | ✓            | ✓             |
| MYPN    |                           |                           |             |                             |                           |                 |                             |                           |             |                             | ✓            | ✓             |
| NEBL    |                           |                           |             |                             |                           |                 |                             | ✓                         |             |                             | ✓            | ✓             |
| NEXN    |                           |                           |             |                             | ✓                         |                 |                             | ✓                         | ✓           |                             | ✓            | ✓             |
| NKX2.5  |                           |                           |             |                             |                           |                 |                             |                           |             |                             | ✓            | ✓             |
| NPPA    |                           |                           |             |                             |                           |                 |                             |                           |             |                             |              | ✓             |
| NRAS    |                           |                           |             |                             |                           |                 |                             |                           |             |                             | ✓            |               |
| PDLIM3  |                           |                           |             |                             |                           |                 |                             |                           |             |                             | ✓            | ✓             |
| PKP2    |                           |                           |             |                             | ✓                         |                 |                             | ✓                         |             |                             | ✓            | ✓             |
| PLEKHM2 |                           |                           |             |                             |                           |                 |                             |                           |             |                             |              | ✓             |
| PLN     | ✓                         | ✓                         | ✓           |                             | ✓                         | ✓               | ✓                           | ✓                         | ✓           | ✓                           | ✓            | ✓             |
| PRDM16  |                           |                           |             |                             |                           |                 |                             |                           |             |                             | ✓            | ✓             |
| PRKAG2  |                           |                           |             | ✓                           | ✓                         |                 |                             | ✓                         |             |                             | ✓            | ✓             |
| PTPN11  |                           |                           |             |                             |                           |                 |                             |                           |             |                             | ✓            |               |
| RAF1    |                           |                           |             |                             |                           |                 |                             |                           |             |                             | ✓            | ✓             |
| RBM20   |                           |                           |             |                             | ✓                         |                 |                             | ✓                         | ✓           |                             | ✓            | ✓             |
| RIT1    |                           |                           |             |                             |                           |                 |                             |                           |             |                             | ✓            |               |
| RYR2    |                           |                           |             |                             | ✓                         |                 |                             | ✓                         |             |                             | ✓            | ✓             |

| Gene    | Harvard Partners LMM 2007 | Harvard Partners LMM 2009 | GeneDx 2009 | Transgenomic/Familion 2009 | Harvard Partners LMM 2011 | GeneDx DCM 2011 | Transgenomic/Familion 2011 | Harvard Partners LMM 2013 | GeneDx 2013 | Transgenomic/Familion 2013 | GeneDx 2017* | Invitae 2017* |
|---------|---------------------------|---------------------------|-------------|----------------------------|---------------------------|-----------------|----------------------------|---------------------------|-------------|----------------------------|--------------|---------------|
| SCN5A   |                           |                           |             |                            |                           |                 | ✓                          | ✓                         | ✓           | ✓                          | ✓            | ✓             |
| SGCD    |                           | ✓                         | ✓           |                            | ✓                         |                 |                            | ✓                         | ✓           |                            | ✓            | ✓             |
| SLC22A5 |                           |                           |             |                            |                           |                 |                            |                           |             |                            |              | ✓             |
| SOS1    |                           |                           |             |                            |                           |                 |                            |                           |             |                            | ✓            |               |
| TAZ     | ✓                         | ✓                         | ✓           |                            | ✓                         | ✓               | ✓                          | ✓                         | ✓           | ✓                          | ✓            | ✓             |
| TCAP    |                           | ✓                         |             |                            | ✓                         |                 |                            | ✓                         |             |                            | ✓            | ✓             |
| TGFB3   |                           |                           |             |                            | ✓                         |                 |                            |                           | ✓           |                            | ✓            | ✓             |
| TMEM43  |                           |                           |             |                            |                           |                 |                            | ✓                         |             |                            |              | ✓             |
| TMPO    |                           |                           |             |                            |                           |                 |                            | ✓                         |             |                            | ✓            | ✓             |
| TNNC1   |                           |                           |             | ✓                          | ✓                         |                 | ✓                          | ✓                         | ✓           | ✓                          | ✓            | ✓             |
| TNNI3   | ✓                         | ✓                         | ✓           | ✓                          | ✓                         | ✓               | ✓                          | ✓                         | ✓           | ✓                          | ✓            | ✓             |
| TNNT2   | ✓                         | ✓                         | ✓           | ✓                          | ✓                         | ✓               | ✓                          | ✓                         | ✓           | ✓                          | ✓            | ✓             |
| TPM1    | ✓                         | ✓                         | ✓           | ✓                          | ✓                         | ✓               | ✓                          | ✓                         | ✓           | ✓                          | ✓            | ✓             |
| TTN     |                           |                           |             |                            | ✓                         |                 |                            | ✓                         | ✓           |                            | ✓            | ✓             |
| TTR     |                           |                           | ✓           |                            | ✓                         | ✓               |                            | ✓                         | ✓           |                            | ✓            | ✓             |
| TXNRD2  |                           |                           |             |                            |                           |                 |                            |                           |             |                            | ✓            | ✓             |
| VCL     |                           | ✓                         |             |                            | ✓                         |                 |                            | ✓                         | ✓           |                            | ✓            | ✓             |

LMM = Laboratory for Molecular Medicine; \* = deletion/duplication added in 2016

**Table S2: Genotype and Variant Classification**  
**Khan et al. Genotype and Cardiac Outcomes in Pediatric Dilated Cardiomyopathy, 2021**

| Gene           | DNA change             | Protein effect         | Clinical Adjudication | Original Report Classification | External Lab Classification | Case Number <sup>a</sup> |
|----------------|------------------------|------------------------|-----------------------|--------------------------------|-----------------------------|--------------------------|
| ACTN2          | c.26A>G                | p.Gln9Arg              | VUS                   | P                              | VUS                         | 104                      |
| ACTN2          | c.26A>G                | p.Gln9Arg              | VUS                   | LP                             | VUS                         | 106                      |
| ACTN2          | c.2630dupG             | p.Ala878Cysfs*62       | P/LP                  | VUS                            | VUS                         | 1                        |
| BAG3           | c.367C>T               | p.Arg123X              | P/LP                  | P                              | P/LP                        | 2                        |
| LMNA           | c.350A>G               | p.Lys117Arg            | P/LP                  | VUS                            | VUS                         | 4                        |
| LMNA           | c.868G>A               | p.Glu290Lys            | P/LP                  | VUS                            | P/LP                        | 3                        |
| MT-TS2         | m.12241delC            |                        | P/LP                  | LP                             | Not provided                | 5                        |
| MYBPC3         | c.1721G>A              | p.Arg574Gln            | P/LP                  | VUS                            | VUS                         | 7                        |
| MYBPC3         | c.1294G>A              | p.Ala432Thr            | P/LP                  | VUS                            | VUS                         | 8                        |
| MYBPC3         | c.3628-41_3628-17del25 | IVS32-41_IVS32-17del25 | P/LP                  | VUS                            | P/LP                        | 6                        |
| MYH7           | c.3113T>C              | p.Leu1038Pro           | P/LP                  | LP                             | VUS                         | 12                       |
| MYH7           | c.2678C>T              | p.Ala893Val            | P/LP                  | VUS                            | P/LP                        | 9                        |
| MYH7           | c.4280A>T              | p.Asp1427Val           | P/LP                  | LP                             | VUS                         | 17                       |
| MYH7           | c.444C>G               | p.Ser148Arg            | P/LP                  | VUS                            | VUS                         | 18                       |
| MYH7           | c.1180G>A              | p.Asp394Asn            | P/LP                  | VUS                            | VUS                         | 10                       |
| MYH7           | c.541G>A               | p.Gly181Arg            | P/LP                  | VUS                            | VUS                         | 15                       |
| MYH7           | c.2585C>T              | p.Ala862Val            | P/LP                  | LP                             | VUS                         | 16                       |
| MYH7           | c.2711G>A              | p.Arg904His            | P/LP                  | P                              | P/LP                        | 11                       |
| MYH7           | c.844G>T               | p.Asp282Tyr            | P/LP                  | VUS                            | VUS                         | 14                       |
| MYH7           | c.1573G>A              | p.Glu525Lys            | P/LP                  | VUS                            | P/LP                        | 13                       |
| MYH7           | c.2710C>T              | p.Arg904Cys            | P/LP                  | P                              | P/LP                        | 19                       |
| MYL2           | c.401A>C               | p.Glu134Ala            | P/LP                  | P                              | VUS                         | 12                       |
| PRDM16         | c.1573dupC             | p.Arg525Profs*79       | P/LP                  | P                              | P/LP                        | 20                       |
| TNNC1          | c.184G>A               | p.Asp62Asn             | P/LP                  | VUS                            | VUS                         | 21                       |
| TNNT2          | c.421C>T               | p.Arg141Trp            | P/LP                  | P                              | P/LP                        | 22                       |
| TNNT2          | c.391C>T               | p.Arg131Trp            | P/LP                  | LP                             | P/LP                        | 24                       |
| TNNT2          | c.392G>A               | p.Arg131Gln            | P/LP                  | LP                             | P/LP                        | 23                       |
| TNNT2          | c.352G>A               | p.Glu118Lys            | P/LP                  | LP                             | VUS                         | 25                       |
| TPM1           | c.725C>T               | p.Ala242Val            | P/LP                  | P                              | VUS                         | 27                       |
| TPM1           | c.479G>A               | p.Arg160His            | P/LP                  | LP                             | P/LP                        | 28                       |
| TPM1           | c.118G>C               | p.Glu40Gln             | P/LP                  | VUS                            | VUS                         | 29                       |
| TPM1           | c.725C>T               | p.Ala242Val            | P/LP                  | P                              | VUS                         | 26                       |
| TPM1           | c.688G>A               | p.Asp230Asn            | P/LP                  | P                              | P/LP                        | 30                       |
| TTN            | c.28363+1G>A           | Splice variant         | P/LP                  | VUS                            | VUS                         | 32                       |
| TTN            | c.75793C>T             | p.Arg25265*            | P/LP                  | P                              | P/LP                        | 34                       |
| TTN            | c.92206_92207dupTA     | p.Leu30738Hisfs*4      | P/LP                  | P                              | P/LP                        | 35                       |
| TTN            | c.75703delG            | p.Val25235Serfs*68     | P/LP                  | LP                             | P/LP                        | 38                       |
| TTN            | c.94261_94262 dupGG    | p.Leu31422Valfs*20     | P/LP                  | P                              | P/LP                        | 33                       |
| TTN            | c.1800+1G>A            | Splice variant         | P/LP                  | LP                             | VUS                         | 37                       |
| TTN            | c.62572C>T             | p.Arg20858*            | P/LP                  | P                              | P/LP                        | 36                       |
| TTN            | c.102712C>T            | p.Gln34238*            | P/LP                  | VUS                            | P/LP                        | 12                       |
| TTN            | c.16387_16390delATCT   | p.Ile5463Valfs*15      | P/LP                  | VUS                            | VUS                         | 37                       |
| TTN            | c.73828G>T             | p.Glu24610*            | P/LP                  | LP                             | P/LP                        | 31                       |
| TTR            | c.424G>A               | p.Val142Ile            | P/LP                  | P                              | P/LP                        | 16                       |
| TTR            | c.424G>A               | p.Val142Ile            | P/LP                  | P                              | P/LP                        | 39                       |
| VCL            | c.562C>T               | p.Arg188*              | P/LP                  | P                              | VUS                         | 40                       |
| VUS only below |                        |                        |                       |                                |                             |                          |
| ACTC1          | c.623G>A               | p.Arg208His            | VUS                   | VUS                            | VUS                         | 86                       |
| ACTC1          | c.579G>T               | p.Lys193Asn            | VUS                   | VUS                            | VUS                         | 61                       |
| ACTC1          | c.119_129+14del25      | p.Pro40Argfs*15        | VUS                   | VUS                            | VUS                         | 86                       |
| ACTN2          | c.2306A>C              | p.Lys769Thr            | VUS                   | VUS                            | VUS                         | 96                       |
| ACTN2          | c.578_583del           | p.His193_Arg194del     | VUS                   | VUS                            | VUS                         | 96                       |
| ACTN2          | c.548G>A               | p.Gly183Asp            | VUS                   | VUS                            | VUS                         | 47                       |
| ACTN2          | c.1984C>T              | p.Arg662Trp            | VUS                   | VUS                            | VUS                         | 11                       |
| ALMS1          | c.11711G>A             | p.Arg3904Gln           | VUS                   | VUS                            | VUS                         | 29                       |
| BAG3           | c.474_476dup           | p.Ala160dup            | VUS                   | VUS                            | B/LB                        | 96                       |
| CTF1           | c.275C>A               | p.Ala92Glu             | VUS                   | VUS                            | VUS                         | 24                       |
| DES            | c.1009G>A              | p.Ala337Thr            | VUS                   | VUS                            | VUS                         | 82                       |
| DES            | c.935A>C               | p.Asp312Ala            | VUS                   | VUS                            | VUS                         | 78                       |
| DES            | c.170C>T               | p.Ser57Leu             | VUS                   | VUS                            | VUS                         | 47                       |
| DES            | c.934G>A               | p.Asp312Asn            | VUS                   | VUS                            | VUS                         | 79                       |
| DMD            | c.404A>G               | p.Asn135Ser            | VUS                   | VUS                            | VUS                         | 77                       |
| DMD            | c.9299A>G              | p.Asn3100Ser           | VUS                   | VUS                            | VUS                         | 106                      |
| DSC2           | c.1914G>C              | p.Gln638His            | VUS                   | VUS                            | B/LB                        | 39                       |
| DSC2           | c.1081G>A              | p.Val361Met            | VUS                   | VUS                            | VUS                         | 61                       |
| DSC2           | c.2446G>A              | p.Val816Met            | VUS                   | VUS                            | VUS                         | 34                       |
| DSC2           | c.26C>G                | p.Ser9Cys              | VUS                   | VUS                            | VUS                         | 74                       |

**Table S2: Genotype and Variant Classification**  
**Khan et al. Genotype and Cardiac Outcomes in Pediatric Dilated Cardiomyopathy, 2021**

| Gene   | DNA change           | Protein effect       | Clinical Adjudication | Original Report Classification | External Lab Classification | Case Number <sup>a</sup> |
|--------|----------------------|----------------------|-----------------------|--------------------------------|-----------------------------|--------------------------|
| DSP    | c.2287T>C            | p.Tyr763His          | VUS                   | VUS                            | VUS                         | 20                       |
| DSP    | c.607G>A             | p.Asp203Asn          | VUS                   | VUS                            | VUS                         | 100                      |
| DSP    | c.4288A>T            | p.Ile1430Phe         | VUS                   | VUS                            | VUS                         | 71                       |
| DSP    | c.88G>A              | p.Val30Met           | B/LB                  | VUS                            | VUS                         | 68                       |
| DSP    | c.269A>G             | p.Gln90Arg           | VUS                   | VUS                            | VUS                         | 11                       |
| DSP    | c.4172A>G            | p.Tyr1391Cys         | VUS                   | VUS                            | VUS                         | 50                       |
| DSP    | c.2723G>A            | p.Arg908His          | VUS                   | VUS                            | VUS                         | 35                       |
| DSP    | c.1778A>G            | p.Asn593Ser          | VUS                   | VUS                            | B/LB                        | 31                       |
| DSP    | c.107G>C             | p.Gly36Ala           | VUS                   | VUS                            | VUS                         | 34                       |
| DSP    | c.8529_8540del12     | p.Ser2843_Arg2846del | VUS                   | VUS                            | VUS                         | 78                       |
| DSP    | c.4372C>G            | p.Arg1458Gly         | VUS                   | VUS                            | VUS                         | 29                       |
| DTNA   | c.1228G>A            | p.Asp410Asn          | VUS                   | VUS                            | VUS                         | 98                       |
| FKRP   | c.404C>A             | p.Ala135Asp          | VUS                   | VUS                            | VUS                         | 52                       |
| FLNC   | c.6539G>A            | p.Arg2180His         | VUS                   | VUS                            | VUS                         | 108                      |
| GLA    | c.1153A>G            | p.Thr385Ala          | VUS                   | VUS                            | B/LB                        | 61                       |
| GLA    | c.427G>A             | p.Ala143Thr          | VUS                   | VUS                            | VUS                         | 39                       |
| ILK    | c.184G>A             | p.Val62Ile           | VUS                   | VUS                            | VUS                         | 90                       |
| LAMA4  | c.2599C>G            | p.Leu867Val          | VUS                   | VUS                            | VUS                         | 29                       |
| LAMA4  | c.2069G>A            | p.Arg690His          | VUS                   | VUS                            | VUS                         | 51                       |
| LAMA4  | c.1612C>T            | p.Arg538Cys          | VUS                   | VUS                            | B/LB                        | 105                      |
| LDB3   | c.752A>G             | p.Lys251Arg          | B/LB                  | LB                             | B/LB                        | 15                       |
| LDB3   | c.1606G>T            | p.Val536Phe          | VUS                   | VUS                            | VUS                         | 39                       |
| LDB3   | c.566C>T             | p.Ser189Leu          | VUS                   | VUS                            | VUS                         | 52                       |
| LMNA   | c.861T>C             | Ala287Ala            | B/LB                  | B                              | B/LB                        | 13                       |
| MYBPC3 | c.2980C>T            | p.Leu994Phe          | VUS                   | VUS                            | VUS                         | 106                      |
| MYBPC3 | c.472G>A             | p.Val158Met          | B/LB                  | LB                             | B/LB                        | 72                       |
| MYBPC3 | c.2870C>G            | p.Thr957Ser          | VUS                   | VUS                            | B/LB                        | 12                       |
| MYBPC3 | c.3682C>T            | p.Arg1228Cys         | VUS                   | VUS                            | VUS                         | 100                      |
| MYBPC3 | c.1519G>A            | p.Gly507Arg          | B/LB                  | VUS                            | B/LB                        | 80                       |
| MYBPC3 | c.472G>A             | p.Val158Met          | B/LB                  | LB                             | B/LB                        | 21                       |
| MYH6   | c.2401A>G            | p.Ile801Val          | VUS                   | VUS                            | VUS                         | 98                       |
| MYH6   | c.5089A>G            | p.Thr1697Ala         | VUS                   | VUS                            | VUS                         | 73                       |
| MYH6   | c.4293G>A            | p.Met1431Ile         | VUS                   | VUS                            | VUS                         | 9                        |
| MYH6   | c.3979-7_3979-6delTC |                      | VUS                   | VUS                            | VUS                         | 73                       |
| MYH7   | c.5495G>A            | p.Arg1832His         | VUS                   | VUS                            | VUS                         | 36                       |
| MYL2   | c.141C>A             | p.Asn47Lys           | VUS                   | VUS                            | VUS                         | 74                       |
| MYLK2  | c.4G>A               | p.Ala2Thr            | B/LB                  | VUS                            | VUS                         | 92                       |
| MYPN   | c.1130G>A            | p.Arg377Gln          | B/LB                  | VUS                            | VUS                         | 109                      |
| MYPN   | c.3481C>A            | p.Leu1161Ile         | VUS                   | VUS                            | B/LB                        | 47                       |
| MYPN   | c.-166-1G>C          | Splice variant       | VUS                   | VUS                            | VUS                         | 89                       |
| MYPN   | c.1594G>A            | p.Val532Met          | VUS                   | VUS                            | VUS                         | 35                       |
| NEBL   | c.604G>A             | p.Gly202Arg          | VUS                   | VUS                            | VUS                         | 2                        |
| NEBL   | c.180G>C             | p.Lys60Asn           | B/LB                  | VUS                            | VUS                         | 87                       |
| NKX2-5 | c.632C>T             | p.Pro211Leu          | VUS                   | VUS                            | VUS                         | 81                       |
| PDLIM3 | c.926G>A             | p.Arg309Gln          | VUS                   | VUS                            | VUS                         | 35                       |
| PDLIM3 | c.697G>C             | p.Val233Leu          | B/LB                  | VUS                            | VUS                         | 88                       |
| PRDM16 | c.2815C>G            | p.Leu939Val          | VUS                   | VUS                            | VUS                         | 11                       |
| PRKAG2 | c.64G>T              | p.Gly22Cys           | VUS                   | VUS                            | VUS                         | 64                       |
| RAF1   | c.1721A>G            | p.Tyr574Cys          | VUS                   | VUS                            | VUS                         | 95                       |
| RAF1   | c.293T>C             | p.Val98Ala           | VUS                   | VUS                            | VUS                         | 36                       |
| RBM20  | c.1459G>A            | p.Val487Met          | VUS                   | LB                             | VUS                         | 42                       |
| RBM20  | c.3301G>A            | p.Glu1101Lys         | VUS                   | VUS                            | VUS                         | 64                       |
| RBM20  | c.2662G>A            | p.Asp888Asn          | VUS                   | VUS                            | B/LB                        | 100                      |
| RBM20  | c.2565_2570delACAGGA | p.Gln856_Glu857del   | VUS                   | VUS                            | VUS                         | 71                       |
| RBM20  | c.2662G>A            | p.Asp888Asn          | VUS                   | VUS                            | B/LB                        | 76                       |
| RYR2   | c.6337G>A            | p.Val2113Met         | VUS                   | VUS                            | VUS                         | 53                       |
| RYR2   | c.2984T>C            | p.Met995Thr          | VUS                   | VUS                            | VUS                         | 47                       |
| SCN5A  | c.1425A>C            | p.Arg475Ser          | VUS                   | VUS                            | VUS                         | 34                       |
| SCN5A  | c.1820G>A            | p.Gly607Asp          | VUS                   | VUS                            | VUS                         | 54                       |
| SCN5A  | c.5972G>A            | p.Arg1991Gln         | VUS                   | VUS                            | VUS                         | 50                       |
| SCN5A  | c.2314G>A            | p.Asp772Asn          | VUS                   | VUS                            | VUS                         | 76                       |
| SCN5A  | c.1673A>G            | p.His558Arg          | B/LB                  | LB                             | B/LB                        | 93                       |
| SCN5A  | c.4342A>C            | p.Ile1448Leu         | VUS                   | VUS                            | VUS                         | 53                       |
| SCN5A  | c.3308C>A            | p.Ser1103Tyr         | B/LB                  | VUS                            | VUS                         | 91                       |
| SGCD   | c.717C>G             | p.Asp239Glu          | VUS                   | VUS                            | B/LB                        | 71                       |
| SGCD   | c.15G>C              | p.Glu5Asp            | B/LB                  | VUS                            | B/LB                        | 41                       |
| SGCD   | c.458A>G             | p.Asp153Gly          | VUS                   | VUS                            | VUS                         | 47                       |



**Table S2: Genotype and Variant Classification**  
**Khan et al. Genotype and Cardiac Outcomes in Pediatric Dilated Cardiomyopathy, 2021**

| <b>Gene</b> | <b>DNA change</b>   | <b>Protein effect</b> | <b>Clinical Adjudication</b> | <b>Original Report Classification</b> | <b>External Lab Classification</b> | <b>Case Number <sup>a</sup></b> |
|-------------|---------------------|-----------------------|------------------------------|---------------------------------------|------------------------------------|---------------------------------|
| SOS2        | c.3443_3454del      | p.Pro1148_Pro1151del  | VUS                          | VUS                                   | VUS                                | 108                             |
| TAZ         | c.383T>C            | p.Phe128Ser           | B/LB                         | VUS                                   | B/LB                               | 99                              |
| TAZ         | c.383T>C            | p.Phe128Ser           | B/LB                         | LB                                    | B/LB                               | 15                              |
| TMEM43      | c.286C>G            | p.Arg96Gly            | VUS                          | VUS                                   | VUS                                | 78                              |
| TMPO        | c.694C>T            | p.Pro232Ser           | VUS                          | VUS                                   | VUS                                | 36                              |
| TNNT2       | c.224T>G            | p.Val75Gly            | VUS                          | VUS                                   | VUS                                | 93                              |
| TNNT2       | c.178A>G            | p.Met60Val            | VUS                          | VUS                                   | B/LB                               | 22                              |
| TNNT2       | c.178A>C            | p.Met60Leu            | VUS                          | VUS                                   | VUS                                | 53                              |
| TNNT2       | c.587G>A            | p.Arg196Gln           | VUS                          | VUS                                   | VUS                                | 36                              |
| TTN         | c.40166_40168delAAG | p.Glu13389del         | VUS                          | VUS                                   | VUS                                | 106                             |
| VCL         | c.2285G>A           | p.Arg762Gln           | VUS                          | VUS                                   | VUS                                | 12                              |

<sup>a</sup> Case number is the same as in Table S4.

**Table S3: Additional *TTN* Information**  
**Khan et al. Genotype and Cardiac Outcomes in Pediatric Dilated Cardiomyopathy Patients, 2021**

| <b>Gene</b> | <b>DNA change</b>    | <b>Protein effect</b> | <b>Transcript Sequenced</b> | <b>Exon</b>      | <b>PSI<sup>a</sup></b> | <b>Protein Location</b> | <b>Case Number<sup>b</sup></b> |
|-------------|----------------------|-----------------------|-----------------------------|------------------|------------------------|-------------------------|--------------------------------|
| TTN         | c.73828G>T           | p.Glu24610*           | NM_133378.4                 | 275              | 100                    | A-band                  | 31                             |
| TTN         | c.28363+1G>A         | Splice variant        | NM_133378.4                 | 122              | 54                     | I-band                  | 32                             |
| TTN         | c.102712C>T          | p.Gln34238*           | NM_001256850.1              | 312              | 100                    | A-band                  | 12                             |
| TTN         | c.94261_94262 dupGG  | p.Leu31422Valfs*20    | NM_001256850.1              | 304              | 100                    | A-band                  | 33                             |
| TTN         | c.75793C>T           | p.Arg25265*           | NM_001256850.1              | 276              | 100                    | A-band                  | 34                             |
| TTN         | c.92206_92207dupTA   | p.Leu30738Hisfs*4     | NM_001256850.1              | 298              | 100                    | A-band                  | 35                             |
| TTN         | c.62572C>T           | p.Arg20858*           | NM_001256850.1              | 269              | 100                    | A-band                  | 36                             |
| TTN         | c.1800+1G>A          | Splice variant        | NM_133378.4                 | 111 <sup>c</sup> | N/A                    | Z-disk                  | 37                             |
| TTN         | c.16387_16390delATCT | p.Ile5463Valfs*15     | NM_133379.3                 | 45A              | N/A                    | N/A                     | 37                             |
| TTN         | c.75703delG          | p.Val25235Serfs*68    | NM_133378.4                 | 275              | 100                    | A-band                  | 38                             |
| TTN         | c.40166_40168delAAG  | p.Glu13389del         | NM_001256850.1              | 195              | 5                      | N/A                     | 106                            |

<sup>a</sup> PSI: Percentage spliced-in. The data shown represent exon usage in the human left ventricle, derived from patients with DCM and were obtained from Royal Brompton & Harefield (NHS Foundation Trust) at [https://www.cardiodb.org/titin/titin\\_transcripts.php](https://www.cardiodb.org/titin/titin_transcripts.php), accessed 15 Jun 2021.

<sup>b</sup> Case number is the same as in Table S4.

<sup>c</sup> Intron 11. Located in the invariant region ( $\pm 1,2$ ) of the splice consensus sequence and predicted to cause altered splicing

Table S4: Phenotype and Genotype  
 Khan et al. Genotype and Cardiac Outcomes in Pediatric Dilated Cardiomyopathy, 2021

| Case Number | Female Sex | Age at Presentation (Years) | Family History    | Life-Threatening Cardiac Outcome | Ventricular Arrhythmia | Cardiac Arrest | Mechanical Support | Transplant | Death | Gene   | cDNA                   | Protein                | Year of Genetic Test |
|-------------|------------|-----------------------------|-------------------|----------------------------------|------------------------|----------------|--------------------|------------|-------|--------|------------------------|------------------------|----------------------|
| 1           | 1          | 0                           | No family history | 0                                | 0                      | 0              | 0                  | 0          | 0     | ACTN2  | c.2630dupG             | p.Ala878Cysfs*62       | 2016                 |
| 2           | 1          | 0                           | No family history | 1                                | 0                      | 0              | 1                  | 1          | 0     | BAG3   | c.367C>T               | p.Arg123*              | 2015                 |
| 3           | 1          | 6                           | No family history | 1                                | 0                      | 0              | 1                  | 1          | 0     | LMNA   | c.868G>A               | p.Glu290Lys            | 2017                 |
| 4           | 1          | 1                           | No family history | 0                                | 0                      | 0              | 0                  | 0          | 0     | LMNA   | c.350A>G               | p.Lys117Arg            | 2010                 |
| 5           | 0          | 2                           | No family history | 0                                | 0                      | 0              | 0                  | 0          | 0     | MT-TS2 | m.12241delC            |                        | 2015                 |
| 6           | 0          | 0                           | 1st degree FH     | 1                                | 0                      | 0              | 0                  | 1          | 0     | MYBPC3 | c.3628-41_3628-17del25 | IVS32-41_IVS32-17del25 | 2016                 |
| 7           | 0          | 14                          | No family history | 1                                | 0                      | 0              | 0                  | 1          | 0     | MYBPC3 | c.1721G>A              | p.Arg574Gln            | 2009                 |
| 8           | 1          | 0                           | No family history | 0                                | 0                      | 0              | 0                  | 0          | 0     | MYBPC3 | c.1294G>A              | p.Ala432Thr            | 2013                 |
| 9           | 0          | 0                           | No family history | 1                                | 0                      | 0              | 0                  | 1          | 0     | MYH7   | c.2678C>T              | p.Ala893Val            | 2014                 |
| 10          | 1          | 0                           | No family history | 1                                | 0                      | 0              | 1                  | 1          | 0     | MYH7   | c.1180G>A              | p.Asp394Asn            | 2012                 |
| 11          | 0          | 0                           | 1st degree FH     | 1                                | 1                      | 0              | 1                  | 1          | 0     | MYH7   | c.2711G>A              | p.Arg904His            | 2016                 |
| 12          | 0          | 0                           | 1st degree FH     | 1                                | 0                      | 1              | 0                  | 1          | 0     | MYH7   | c.3113T>C              | p.Leu1038Pro           | 2015                 |
| 12          | 0          | 0                           | 1st degree FH     | 1                                | 0                      | 1              | 0                  | 1          | 0     | MYL2   | c.401A>C               | p.Glu134Ala            | 2015                 |
| 12          | 0          | 0                           | 1st degree FH     | 1                                | 0                      | 1              | 0                  | 1          | 0     | TTN    | c.102712C>T            | p.Gln34238*            | 2015                 |
| 13          | 1          | 0                           | No family history | 1                                | 0                      | 0              | 1                  | 1          | 0     | MYH7   | c.1573G>A              | p.Glu525Lys            | 2008                 |
| 14          | 1          | 0                           | 1st degree FH     | 0                                | 0                      | 0              | 0                  | 0          | 0     | MYH7   | c.844G>T               | p.Asp282Tyr            | 2012                 |
| 15          | 0          | 5                           | 1st degree FH     | 0                                | 0                      | 0              | 0                  | 0          | 0     | MYH7   | c.541G>A               | p.Gly181Arg            | 2012                 |
| 16          | 0          | 18                          | No family history | 0                                | 1                      | 0              | 0                  | 0          | 0     | MYH7   | c.2585C>T              | p.Ala862Val            | 2015                 |
| 16          | 0          | 18                          | No family history | 0                                | 1                      | 0              | 0                  | 0          | 0     | TTR    | c.424G>A               | p.Val142Ile            | 2015                 |
| 17          | 1          | 3                           | 1st degree FH     | 0                                | 0                      | 0              | 0                  | 0          | 0     | MYH7   | c.4280A>T              | p.Asp1427Val           | 2014                 |
| 18          | 1          | 0                           | No family history | 0                                | 0                      | 0              | 0                  | 0          | 0     | MYH7   | c.444C>G               | p.Ser148Arg            | 2017                 |
| 19          | 1          | 10                          | No family history | 1                                | 1                      | 0              | 0                  | 1          | 0     | MYH7   | c.2710C>T              | p.Arg904Cys            | 2009                 |
| 20          | 0          | 0                           | No family history | 0                                | 0                      | 0              | 0                  | 0          | 0     | PRDM16 | c.1573dupC             | p.Arg525Profs*79       | 2016                 |
| 21          | 1          | 15                          | 1st degree FH     | 0                                | 0                      | 0              | 0                  | 0          | 0     | TNNC1  | c.184G>A               | p.Asp62Asn             | 2013                 |
| 22          | 1          | 0                           | No family history | 1                                | 0                      | 0              | 1                  | 1          | 1     | TNNT2  | c.421C>T               | p.Arg141Trp            | 2011                 |
| 23          | 0          | 0                           | No family history | 0                                | 1                      | 0              | 0                  | 0          | 0     | TNNT2  | c.392G>A               | p.Arg131Gln            | 2009                 |
| 24          | 1          | 5                           | 1st degree FH     | 0                                | 0                      | 0              | 0                  | 0          | 0     | TNNT2  | c.391C>T               | p.Arg131Trp            | 2013                 |
| 25          | 0          | 0                           | No family history | 1                                | 1                      | 0              | 0                  | 1          | 0     | TNNT2  | c.352G>A               | p.Glu118Lys            | 2013                 |
| 26          | 1          | 0                           | 1st degree FH     | 0                                | 0                      | 0              | 0                  | 0          | 0     | TPM1   | c.725C>T               | p.Ala242Val            | 2009                 |
| 27          | 0          | 0                           | 1st degree FH     | 0                                | 0                      | 0              | 0                  | 0          | 0     | TPM1   | c.725C>T               | p.Ala242Val            | 2009                 |
| 28          | 1          | 0                           | No family history | 1                                | 0                      | 0              | 0                  | 1          | 0     | TPM1   | c.479G>A               | p.Arg160His            | 2010                 |
| 29          | 0          | 0                           | No family history | 1                                | 1                      | 0              | 0                  | 1          | 0     | TPM1   | c.118G>C               | p.Glu40Gln             | 2017                 |
| 30          | 1          | 0                           | 1st degree FH     | 0                                | 0                      | 0              | 0                  | 0          | 0     | TPM1   | c.688G>A               | p.Asp230Asn            | 2007                 |
| 31          | 1          | 6                           | 1st degree FH     | 1                                | 0                      | 0              | 1                  | 1          | 0     | TTN    | c.73828G>T             | p.Glu24610*            | 2012                 |
| 32          | 0          | 0                           | No family history | 0                                | 0                      | 0              | 0                  | 0          | 0     | TTN    | c.28363+1G>A           |                        | 2013                 |
| 33          | 0          | 18                          | 1st degree FH     | 0                                | 0                      | 0              | 0                  | 0          | 0     | TTN    | c.94261_94262 dupGG    | p.Leu31422Valfs*20     | 2014                 |
| 34          | 0          | 15                          | 1st degree FH     | 0                                | 1                      | 0              | 0                  | 0          | 0     | TTN    | c.75793C>T             | p.Arg25265*            | 2016                 |
| 35          | 0          | 16                          | No family history | 1                                | 1                      | 0              | 1                  | 1          | 0     | TTN    | c.92206_92207dupTA     | p.Leu30738Hisfs*4      | 2014                 |
| 36          | 1          | 13                          | No family history | 1                                | 1                      | 0              | 0                  | 1          | 0     | TTN    | c.62572C>T             | p.Arg20858*            | 2016                 |
| 37          | 0          | 1                           | Higher degree FH  | 0                                | 0                      | 0              | 0                  | 0          | 0     | TTN    | c.1800+1G>A            | Splice variant         | 2012                 |
| 37          | 0          | 1                           | Higher degree FH  | 0                                | 0                      | 0              | 0                  | 0          | 0     | TTN    | c.16387_16390delATCT   | p.Ile5463Valfs*15      | 2012                 |
| 38          | 0          | 14                          | No family history | 1                                | 1                      | 0              | 0                  | 1          | 0     | TTN    | c.75703delG            | p.Val25235Serfs*68     | 2013                 |
| 39          | 1          | 2                           | No family history | 1                                | 1                      | 0              | 1                  | 0          | 0     | TTR    | c.424G>A               | p.Val142Ile            | 2015                 |
| 40          | 1          | 0                           | No family history | 1                                | 0                      | 0              | 0                  | 1          | 0     | VCL    | c.562C>T               | p.Arg188*              | 2010                 |

Table S4: Phenotype and Genotype  
 Khan et al. Genotype and Cardiac Outcomes in Pediatric Dilated Cardiomyopathy, 2021

| Case Number | Female Sex | Age at Presentation (Years) | Family History    | Life-Threatening Cardiac Outcome | Ventricular Arrhythmia | Cardiac Arrest | Mechanical Support | Transplant | Death | Gene             | cDNA | Protein | Year of Genetic Test |
|-------------|------------|-----------------------------|-------------------|----------------------------------|------------------------|----------------|--------------------|------------|-------|------------------|------|---------|----------------------|
| 41          | 0          | 1                           | No family history | 0                                | 0                      | 0              | 0                  | 0          | 0     | No P/LP Variants |      |         |                      |
| 42          | 1          | 0                           | Higher degree FH  | 0                                | 0                      | 0              | 0                  | 0          | 0     | No P/LP Variants |      |         |                      |
| 43          | 0          | 0                           | Higher degree FH  | 0                                | 0                      | 0              | 0                  | 0          | 0     | No P/LP Variants |      |         |                      |
| 44          | 1          | 12                          | No family history | 0                                | 1                      | 0              | 0                  | 0          | 0     | No P/LP Variants |      |         |                      |
| 45          | 0          | 13                          | No family history | 1                                | 0                      | 0              | 0                  | 1          | 0     | No P/LP Variants |      |         |                      |
| 46          | 0          | 3                           | No family history | 1                                | 0                      | 0              | 1                  | 0          | 1     | No P/LP Variants |      |         |                      |
| 47          | 0          | 0                           | No family history | 0                                | 0                      | 0              | 0                  | 0          | 0     | No P/LP Variants |      |         |                      |
| 48          | 1          | 0                           | No family history | 0                                | 0                      | 0              | 0                  | 0          | 0     | No P/LP Variants |      |         |                      |
| 49          | 0          | 15                          | No family history | 0                                | 0                      | 0              | 0                  | 0          | 0     | No P/LP Variants |      |         |                      |
| 50          | 0          | 0                           | No family history | 1                                | 0                      | 0              | 0                  | 1          | 0     | No P/LP Variants |      |         |                      |
| 51          | 0          | 0                           | No family history | 0                                | 0                      | 0              | 0                  | 0          | 0     | No P/LP Variants |      |         |                      |
| 52          | 1          | 0                           | Higher degree FH  | 0                                | 0                      | 0              | 0                  | 0          | 0     | No P/LP Variants |      |         |                      |
| 53          | 1          | 8                           | No family history | 1                                | 1                      | 1              | 1                  | 1          | 0     | No P/LP Variants |      |         |                      |
| 54          | 0          | 0                           | No family history | 0                                | 0                      | 0              | 0                  | 0          | 0     | No P/LP Variants |      |         |                      |
| 55          | 0          | 10                          | 1st degree FH     | 1                                | 1                      | 1              | 0                  | 1          | 0     | No P/LP Variants |      |         |                      |
| 56          | 0          | 0                           | 1st degree FH     | 1                                | 0                      | 0              | 0                  | 1          | 1     | No P/LP Variants |      |         |                      |
| 57          | 0          | 2                           | No family history | 0                                | 0                      | 0              | 0                  | 0          | 0     | No P/LP Variants |      |         |                      |
| 58          | 0          | 12                          | No family history | 0                                | 0                      | 0              | 0                  | 0          | 0     | No P/LP Variants |      |         |                      |
| 59          | 1          | 0                           | No family history | 1                                | 1                      | 0              | 0                  | 1          | 1     | No P/LP Variants |      |         |                      |
| 60          | 0          | 1                           | Higher degree FH  | 1                                | 0                      | 0              | 1                  | 1          | 0     | No P/LP Variants |      |         |                      |
| 61          | 0          | 0                           | 1st degree FH     | 0                                | 0                      | 0              | 0                  | 0          | 0     | No P/LP Variants |      |         |                      |
| 62          | 1          | 0                           | 1st degree FH     | 1                                | 0                      | 0              | 0                  | 1          | 0     | No P/LP Variants |      |         |                      |
| 63          | 1          | 13                          | 1st degree FH     | 1                                | 0                      | 0              | 0                  | 1          | 0     | No P/LP Variants |      |         |                      |
| 64          | 1          | 1                           | No family history | 0                                | 0                      | 0              | 0                  | 0          | 0     | No P/LP Variants |      |         |                      |
| 65          | 1          | 1                           | No family history | 0                                | 0                      | 0              | 0                  | 0          | 0     | No P/LP Variants |      |         |                      |
| 66          | 0          | 14                          | No family history | 0                                | 1                      | 0              | 0                  | 0          | 0     | No P/LP Variants |      |         |                      |
| 67          | 0          | 0                           | No family history | 1                                | 0                      | 0              | 0                  | 1          | 0     | No P/LP Variants |      |         |                      |
| 68          | 1          | 13                          | No family history | 0                                | 1                      | 0              | 0                  | 0          | 0     | No P/LP Variants |      |         |                      |
| 69          | 0          | 10                          | No family history | 1                                | 0                      | 0              | 0                  | 1          | 1     | No P/LP Variants |      |         |                      |
| 70          | 0          | 16                          | No family history | 0                                | 1                      | 0              | 0                  | 0          | 0     | No P/LP Variants |      |         |                      |
| 71          | 1          | 0                           | No family history | 0                                | 0                      | 0              | 0                  | 0          | 0     | No P/LP Variants |      |         |                      |
| 72          | 0          | 1                           | 1st degree FH     | 0                                | 0                      | 0              | 0                  | 0          | 0     | No P/LP Variants |      |         |                      |
| 73          | 0          | 1                           | No family history | 0                                | 0                      | 0              | 0                  | 0          | 0     | No P/LP Variants |      |         |                      |
| 74          | 1          | 0                           | No family history | 0                                | 0                      | 0              | 0                  | 0          | 0     | No P/LP Variants |      |         |                      |
| 75          | 0          | 0                           | No family history | 1                                | 0                      | 0              | 0                  | 1          | 0     | No P/LP Variants |      |         |                      |
| 76          | 0          | 10                          | 1st degree FH     | 1                                | 0                      | 0              | 0                  | 1          | 0     | No P/LP Variants |      |         |                      |
| 77          | 1          | 0                           | No family history | 1                                | 0                      | 1              | 0                  | 1          | 0     | No P/LP Variants |      |         |                      |
| 78          | 1          | 1                           | No family history | 1                                | 1                      | 1              | 0                  | 0          | 0     | No P/LP Variants |      |         |                      |
| 79          | 0          | 17                          | Higher degree FH  | 0                                | 1                      | 0              | 0                  | 0          | 0     | No P/LP Variants |      |         |                      |
| 80          | 1          | 0                           | No family history | 1                                | 0                      | 0              | 0                  | 1          | 0     | No P/LP Variants |      |         |                      |
| 81          | 0          | 0                           | No family history | 0                                | 0                      | 0              | 0                  | 0          | 0     | No P/LP Variants |      |         |                      |
| 82          | 1          | 0                           | No family history | 0                                | 0                      | 0              | 0                  | 0          | 0     | No P/LP Variants |      |         |                      |
| 83          | 0          | 1                           | Higher degree FH  | 1                                | 0                      | 0              | 0                  | 1          | 0     | No P/LP Variants |      |         |                      |
| 84          | 0          | 4                           | Higher degree FH  | 1                                | 0                      | 0              | 0                  | 1          | 0     | No P/LP Variants |      |         |                      |

Table S4: Phenotype and Genotype  
 Khan et al. Genotype and Cardiac Outcomes in Pediatric Dilated Cardiomyopathy, 2021

| Case Number | Female Sex | Age at Presentation (Years) | Family History    | Life-Threatening Cardiac Outcome | Ventricular Arrhythmia | Cardiac Arrest | Mechanical Support | Transplant | Death | Gene             | cDNA | Protein | Year of Genetic Test |
|-------------|------------|-----------------------------|-------------------|----------------------------------|------------------------|----------------|--------------------|------------|-------|------------------|------|---------|----------------------|
| 85          | 0          | 1                           | No family history | 0                                | 0                      | 0              | 0                  | 0          | 0     | No P/LP Variants |      |         |                      |
| 86          | 1          | 0                           | 1st degree FH     | 0                                | 0                      | 0              | 0                  | 0          | 0     | No P/LP Variants |      |         |                      |
| 87          | 1          | 0                           | No family history | 0                                | 0                      | 0              | 0                  | 0          | 0     | No P/LP Variants |      |         |                      |
| 88          | 0          | 0                           | No family history | 0                                | 0                      | 0              | 0                  | 0          | 0     | No P/LP Variants |      |         |                      |
| 89          | 1          | 4                           | No family history | 1                                | 1                      | 1              | 1                  | 0          | 0     | No P/LP Variants |      |         |                      |
| 90          | 0          | 1                           | No family history | 0                                | 0                      | 0              | 0                  | 0          | 0     | No P/LP Variants |      |         |                      |
| 91          | 0          | 1                           | No family history | 0                                | 0                      | 0              | 0                  | 0          | 0     | No P/LP Variants |      |         |                      |
| 92          | 0          | 16                          | 1st degree FH     | 1                                | 0                      | 0              | 0                  | 0          | 1     | No P/LP Variants |      |         |                      |
| 93          | 1          | 0                           | No family history | 0                                | 0                      | 0              | 0                  | 0          | 0     | No P/LP Variants |      |         |                      |
| 94          | 1          | 7                           | No family history | 1                                | 1                      | 0              | 0                  | 1          | 0     | No P/LP Variants |      |         |                      |
| 95          | 0          | 0                           | No family history | 1                                | 0                      | 0              | 0                  | 1          | 0     | No P/LP Variants |      |         |                      |
| 96          | 0          | 1                           | No family history | 1                                | 0                      | 0              | 0                  | 1          | 1     | No P/LP Variants |      |         |                      |
| 97          | 1          | 0                           | No family history | 1                                | 1                      | 1              | 1                  | 1          | 0     | No P/LP Variants |      |         |                      |
| 98          | 0          | 15                          | 1st degree FH     | 0                                | 0                      | 0              | 0                  | 0          | 0     | No P/LP Variants |      |         |                      |
| 99          | 1          | 2                           | No family history | 0                                | 1                      | 0              | 0                  | 0          | 0     | No P/LP Variants |      |         |                      |
| 100         | 0          | 0                           | No family history | 1                                | 0                      | 0              | 0                  | 1          | 0     | No P/LP Variants |      |         |                      |
| 101         | 1          | 1                           | No family history | 1                                | 1                      | 0              | 1                  | 1          | 0     | No P/LP Variants |      |         |                      |
| 102         | 0          | 0                           | 1st degree FH     | 0                                | 0                      | 0              | 0                  | 0          | 0     | No P/LP Variants |      |         |                      |
| 103         | 1          | 2                           | No family history | 0                                | 0                      | 0              | 0                  | 0          | 0     | No P/LP Variants |      |         |                      |
| 104         | 0          | 16                          | No family history | 1                                | 0                      | 0              | 0                  | 1          | 1     | No P/LP Variants |      |         |                      |
| 105         | 1          | 0                           | No family history | 1                                | 0                      | 0              | 0                  | 1          | 0     | No P/LP Variants |      |         |                      |
| 106         | 1          | 1                           | No family history | 1                                | 1                      | 0              | 0                  | 1          | 0     | No P/LP Variants |      |         |                      |
| 107         | 0          | 15                          | No family history | 1                                | 0                      | 0              | 1                  | 1          | 0     | No P/LP Variants |      |         |                      |
| 108         | 0          | 15                          | No family history | 0                                | 1                      | 0              | 0                  | 0          | 0     | No P/LP Variants |      |         |                      |
| 109         | 1          | 15                          | No family history | 0                                | 0                      | 0              | 0                  | 0          | 0     | No P/LP Variants |      |         |                      |

Abbreviations: \* = Truncation; del = Deletion; fs = Frame shift; dup = Duplication. All variants are heterozygous, except 1 hemizygous and 1 mitochondrial variant.
